# Supplementary material for: Transcriptomic analysis identifies the key genes involved in stamen petaloid in lotus (Nelumbo nucifera)
Source: PubMed Central journal article supplement (PMC6062958; doi:10.1186/s12864-018-4950-0), 2018-07-27
Supplement: 12864_2018_4950_MOESM1_ESM.pdf [file 12864_2018_4950_MOESM1_ESM.pdf]

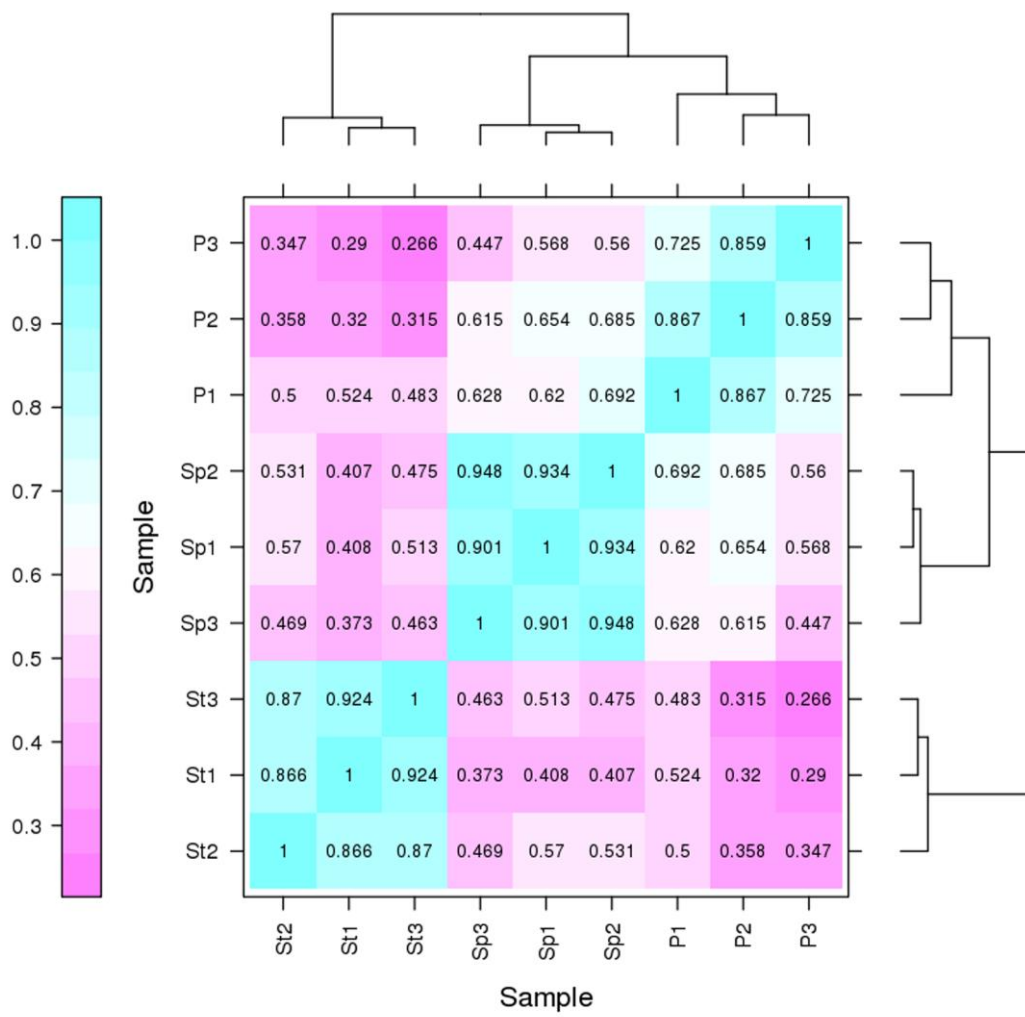

**Fig. S1** Pearson's correlation coefficients for three biological replicates in different floral organ in *Nelumbo nucifera*.

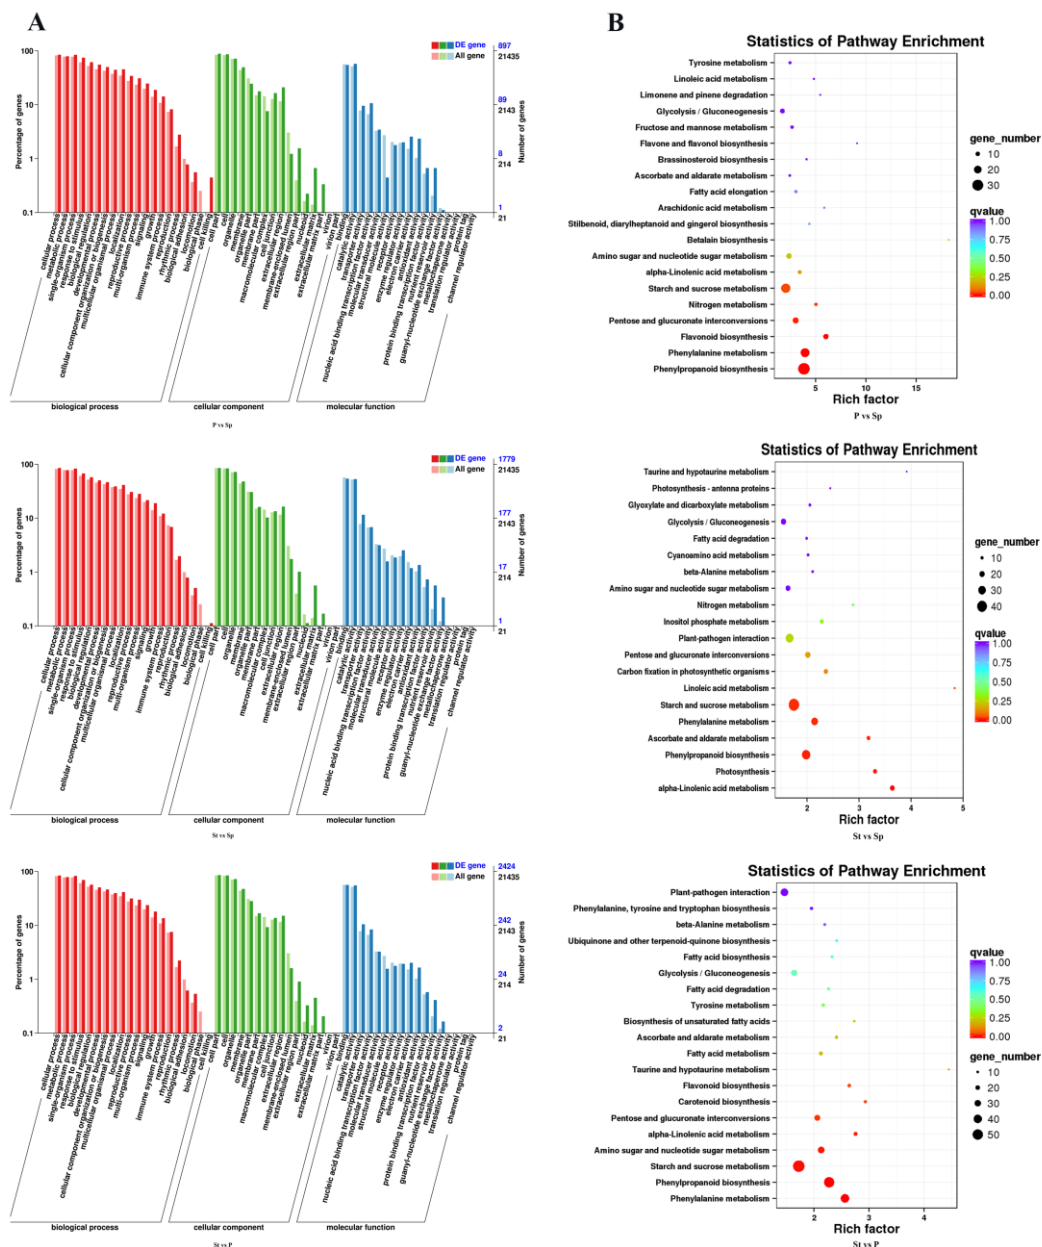

**Fig. S2** GO terms (A) and KEGG pathways (B) significantly enriched in DEGs in comparisons of P, Sp and St.

**Plant hormone signal transduction**

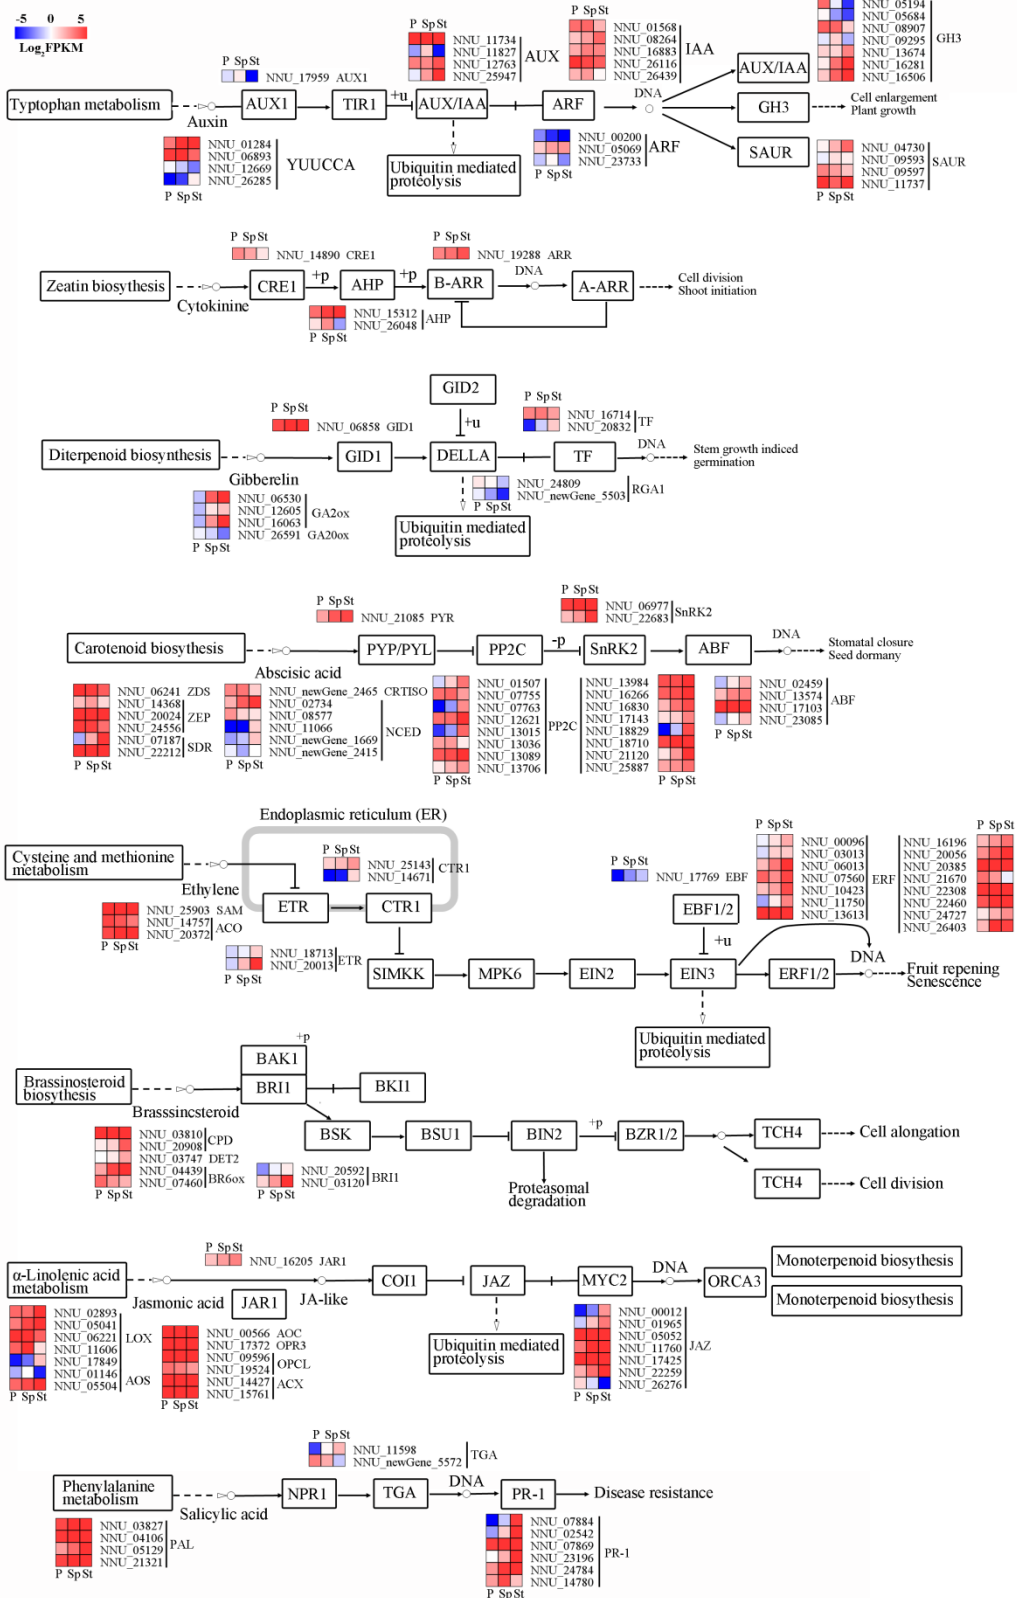

**Fig. S3 Heat maps of phytohormone related genes in the three floral organs of *Nelumbo nucifera*.**

The figure was revised from ko04075.

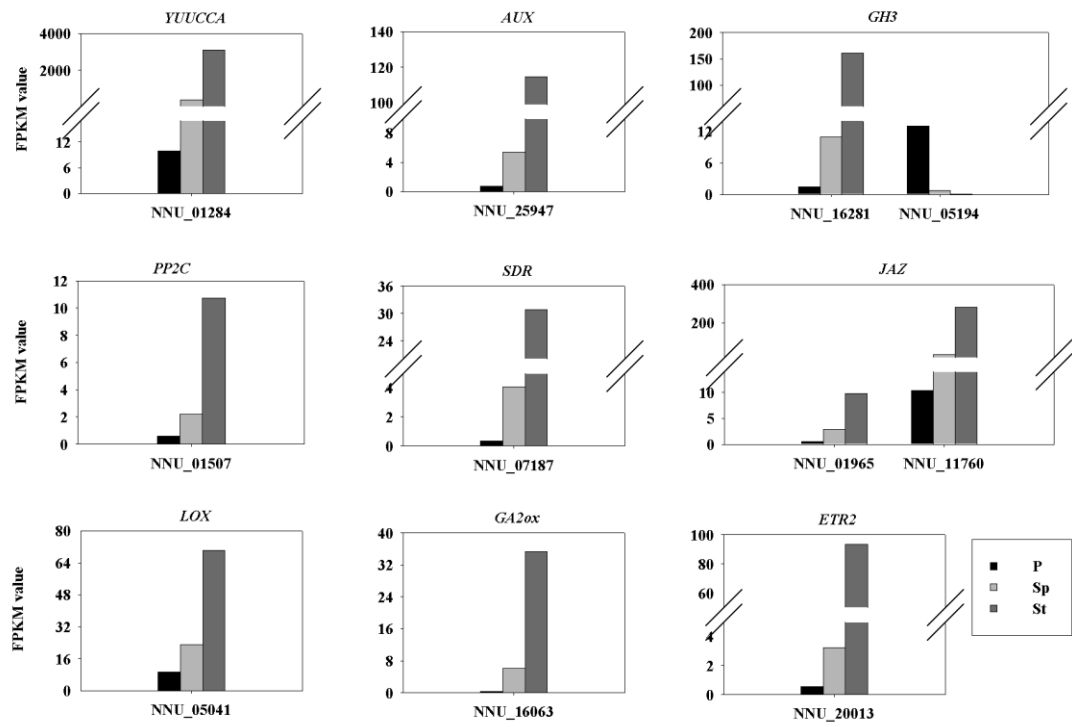

Fig. S4 Eleven phytohormone related genes.

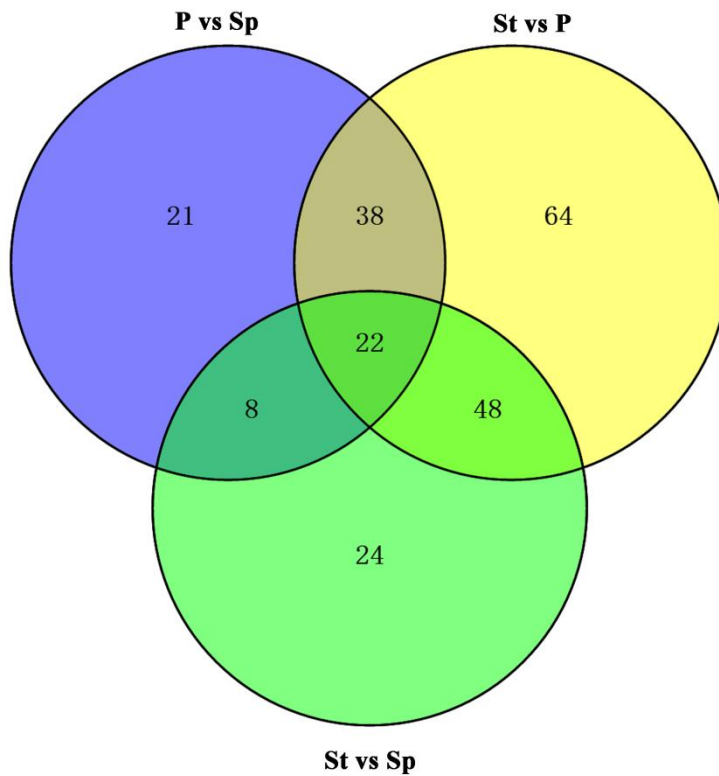

Fig. S5 The venn diagram of TFs in three pair comparison.

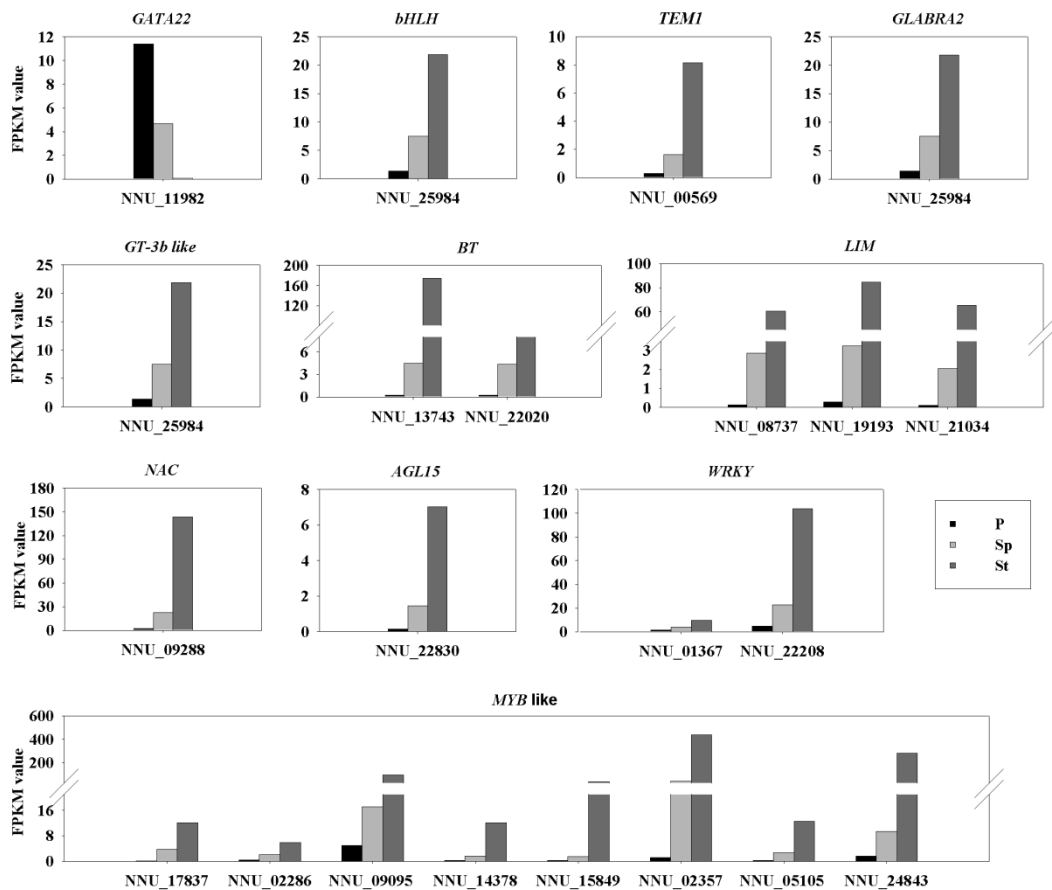

Fig. S6 22 transcription factors.

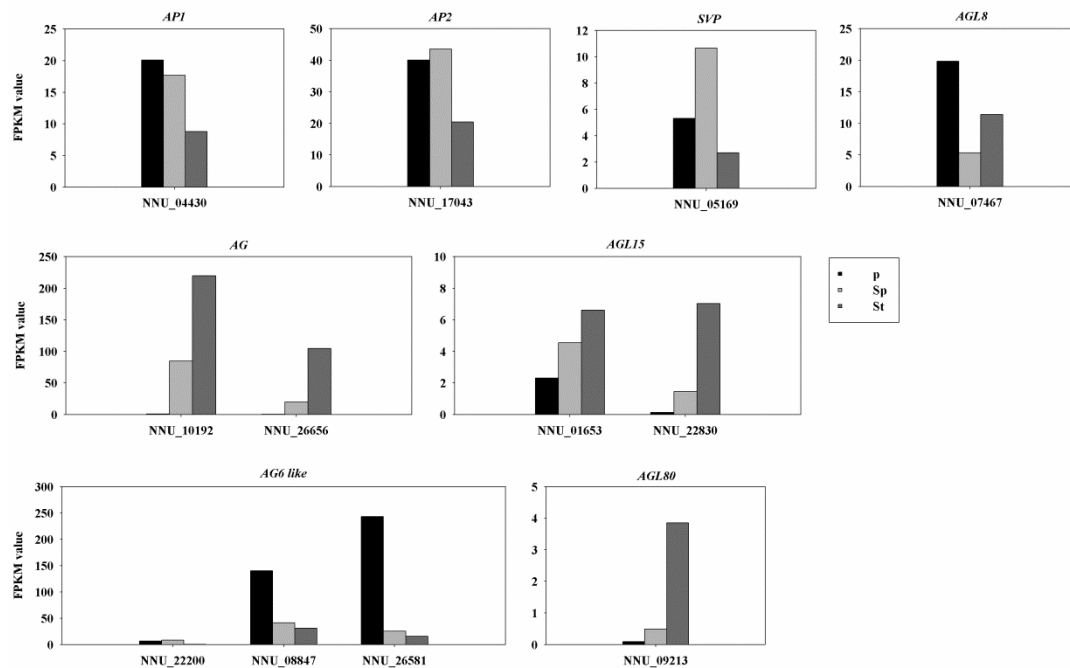

Fig. S7 Twelve floral homeotic genes.

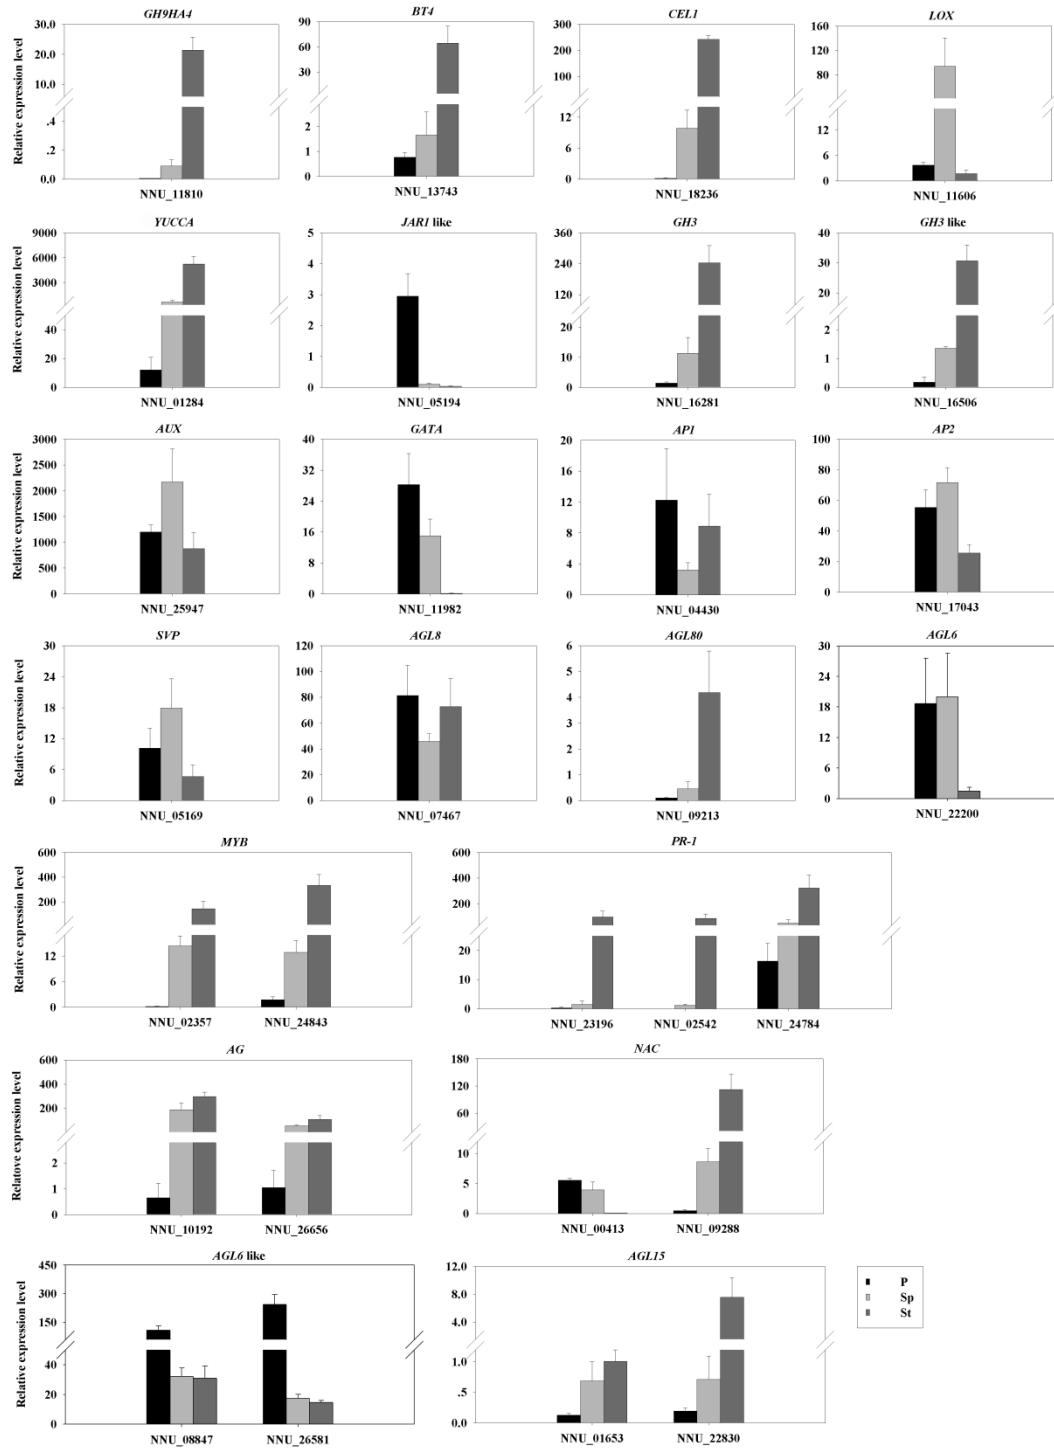

**Fig. S8 Quantitative real-time PCR confirmation of 29 candidate genes at petal, stamen petaloid stamen in lotus.** Relative gene expressions were normalized by comparison with the expression of lotus  $\beta$ -actin (NNU\_24864), and using the  $2^{-\Delta\Delta CT}$  method. Each gene used three biological replicates,

with three technical replicates per experiment in all qRT-PCRs. The Error bars represented the SD for three biological replicates.

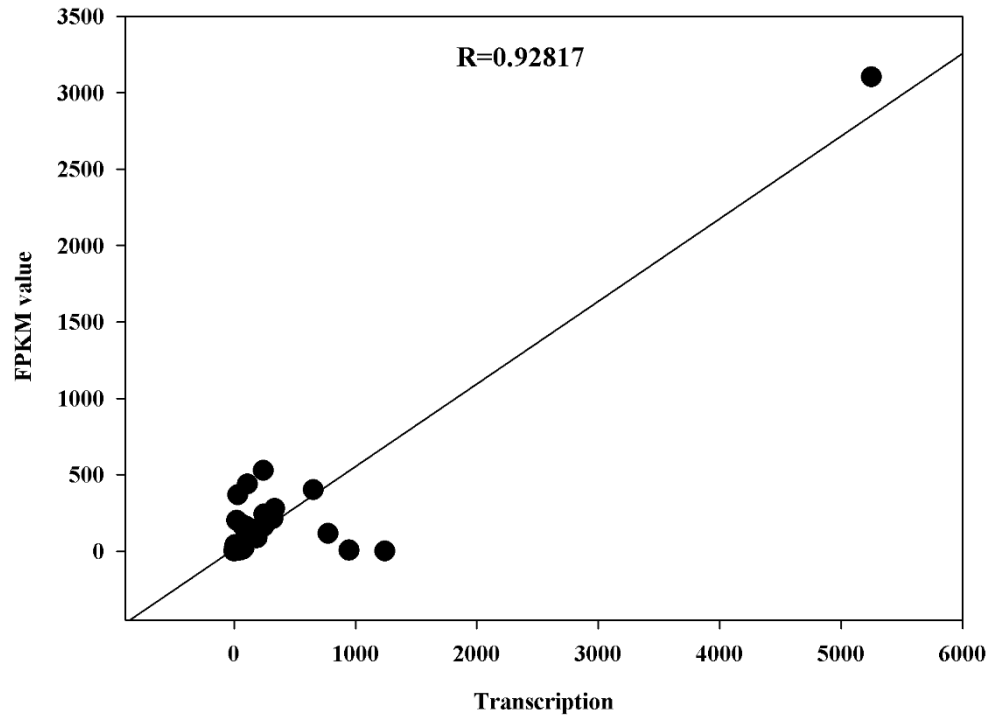

**Fig. S9 The correlation between qRT-PCR result and RNA-Seq data.**

**Table S1. The novel transcripts annotation**

| Annotated Database   | Annotated Number | 300<=length<1000 | length>=1000 |
|----------------------|------------------|------------------|--------------|
| COG Annotation       | 321              | 29               | 291          |
| GO Annotation        | 758              | 122              | 629          |
| KEGG Annotation      | 493              | 76               | 413          |
| Swissprot Annotation | 923              | 119              | 798          |
| Nr Annotation        | 1835             | 300              | 1527         |
| All Annotated        | 1836             | 300              | 1528         |

**Table S2 Primers used to assay gene expression by qRT-PCR**

| Gene name      | Gene ID   | Forward primer (5'→3')   | Reverse primer (5'→3')   |
|----------------|-----------|--------------------------|--------------------------|
| <i>β-actin</i> | NUU_24864 | GATGCCCTGATGAAGATCC      | CCACTCAGCACAATGTTTCC     |
| AUX            | NUU_25947 | AGGAGTGTGTTCAACCCCG      | CACCGCTGTAGAGCCAGTCAT    |
| BT4            | NUU_13743 | GTTGAGAGTTCCAGGGGTTG     | TCATCGGAGTTGGCACAGAGG    |
| CEL1           | NUU_18236 | ACTCGCAGCCTCCTCCTT       | CTCCCCATAACAGTTCGTCAT    |
| GATA           | NUU_11982 | TCAGCGAGGTGGATGTCTTC     | CAGTGATGTTGCTATTGTTGGA   |
| GH3.1          | NUU_16281 | GCCTGTGATGAACCTTTAC      | GCGTCTTTGTCTCGGATT       |
| GH3            | NUU_16506 | CGTTGTTTTGAGCATAGATTCG   | CCAGATGATTGGTGGCGTTT     |
| GH9A4          | NUU_11810 | GTAAACTCCTCAACAAGGCAAAAG | CAGAATAAGAGCAATAGAATGGGC |
| JAR1           | NUU_05194 | GGTGCCGCTCTCTCAAGTTAC    | ACCACATCCCCTAACCTGTATCT  |
| LOX            | NUU_11606 | ACCACATCCCCTAACCTGTATCT  | TGACTACTATCATCTGGGTTGCC  |
| MYB            | NUU_02357 | CGAAAACACATCAAGGAAGCAG   | GTCGTTAGATTCAGTGGGCAAA   |
| MYB            | NUU_24843 | GACGAACACGGTAACAAGCG     | GTGATGGTTTCCTCTGTCTTTG   |
| NAC            | NUU_09288 | TGGGTCTTATGCCGAATCTAC    | GTCAGTTTCAAGCAACGAGCC    |
| PRB1           | NUU_02542 | TGGGATGATGACTGCGTTAGC    | TTCTTGTCTTCCTGGTTCGG     |
| PRP1           | NUU_24784 | AAGGAGATGGTGGCGTCG       | CTGGTAGGATGGAGGGCAAT     |
| STH21          | NUU_23196 | GCTGAAATCTGCTTGCTACGAG   | ACATTCCAGTCATCCCATCCTT   |
| YUCCA10        | NUU_01284 | ATCTCCCCTACTTCGCCGTG     | CGATGATTGGATACTTGCCGT    |
| AG             | NUU_10192 | TGGAGGGTAGATTGGAGAAAGG   | TGGCGAGAGTAATGGTGGTTG    |
| AG             | NUU_26656 | GCAGAAAAGGGAGATTGAGTTA   | GTGGTTGGGTTCCAGTAGATT    |
| AGL6           | NUU_22200 | TACCAGTTTGCCAATCCCG      | ATGCCTGTGCCTTGCCCTC      |
| AGL6 like      | NUU_26581 | ATGGGAAGAGGACGAGTAGAG    | GTCGCAGAGCACAGAAAGC      |
| AGL6 like      | NUU_08847 | TTTCTTTCTCGTGGTCCGGCTAT  | AACCGTTCCTCCGCTTGG       |
| AGL8           | NUU_07467 | AAGCGGAGGAACGGATTGC      | CCCTTGGTGGAGAAGACGAT     |
| AGL15          | NUU_01653 | CGGCGGATGATGGGTAAAG      | CAATCGGAGATAAGGTGGCA     |
| AGL15          | NUU_22830 | AGAGGGAAGATTGAAATAAAGAGG | CACTGCTGGAAAAGATAATGAGAG |
| AGL80          | NUU_09213 | AATAGCAGTGCCGTGTTCC      | ATTGATTTCCGCTTGGGTTA     |
| AP1            | NUU_04430 | TAGCACAAGAACGAGGATGG     | CAGTTTGGACAATGAAGGGA     |
| AP2            | NUU_17043 | CATACGACAGAGCAGCCATAA    | GAGCCTCCCATCTTCCACAT     |
| SVP            | NUU_05169 | GCGGTTGAGCAAGGAAGTT      | CGCTGACAAGCACGAAGT       |
